# Supplementary material for: Polarization- and wavelength-dependent defocused scattering imaging of single gold nanostars with multiple long branches
Source: Royal Society of Chemistry journal article supplement (doi:10.1039/c9pp00083f), 2019-04-01
Supplement: c9pp00083f1.pdf [file c9pp00083f1.pdf]

## **Electronic Supplementary Information**

*for*

### **Polarization- and Wavelength-Dependent Defocused Scattering Imaging of Single Gold Nanostars with Multiple Long Branches**

Geun Wan Kim<sup>1</sup> and Ji Won Ha<sup>1\*</sup>

<sup>1</sup>Advanced Nano-Bio-Imaging and Spectroscopy Laboratory, Department of Chemistry,  
University of Ulsan, 93 Daehak-ro, Nam-gu, Ulsan 44610, South Korea

\*To whom correspondence should be addressed.

**J. W. Ha**

Phone: +82-52-712-8012

Fax: +82-52-712-8002

E-mail: [jwha77@ulsan.ac.kr](mailto:jwha77@ulsan.ac.kr)

This document contains two supplementary movies (Movies S1 and S2) and supplementary figures (Fig. S1 to S9).

## Supplementary Movies

**Movie S1:** A movie to show single AuNSs deposited on a glass slide, which was measured at 700 nm with a temporal resolution of 100 ms. Almost all of the AuNSs were fixed on the glass slide, whereas some AuNSs were rotating on the glass slide.

**Movie S2:** A movie to show rotational dynamics of single AuNS rotating on a glass slide, which was measured at 700 nm with a temporal resolution of 100 ms. There was slight movement of the AuNS on the glass slide.

## Supplementary Figures

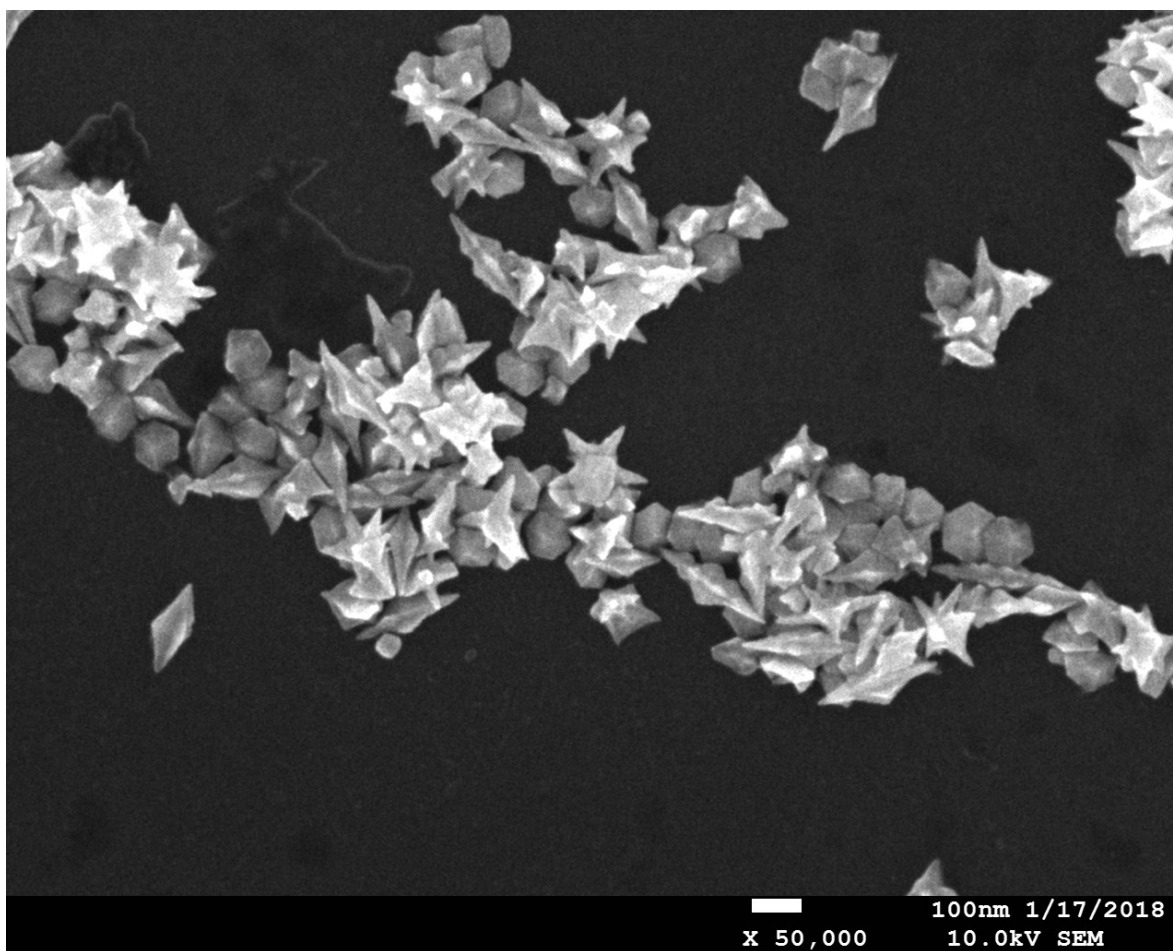

**Fig. S1** SEM image of gold nanostars (AuNSs) with sharp and long branches.

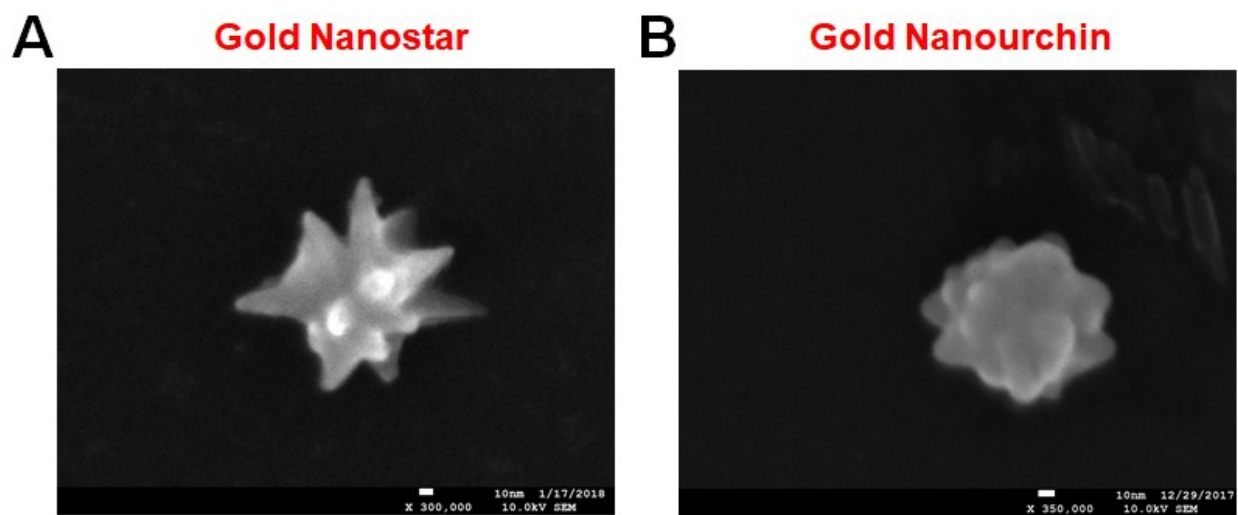

**Fig. S2** (A) SEM image of single AuNS with long branches. (B) SEM image of single gold nanourchin (AuNU) with short branches in comparison with AuNS.

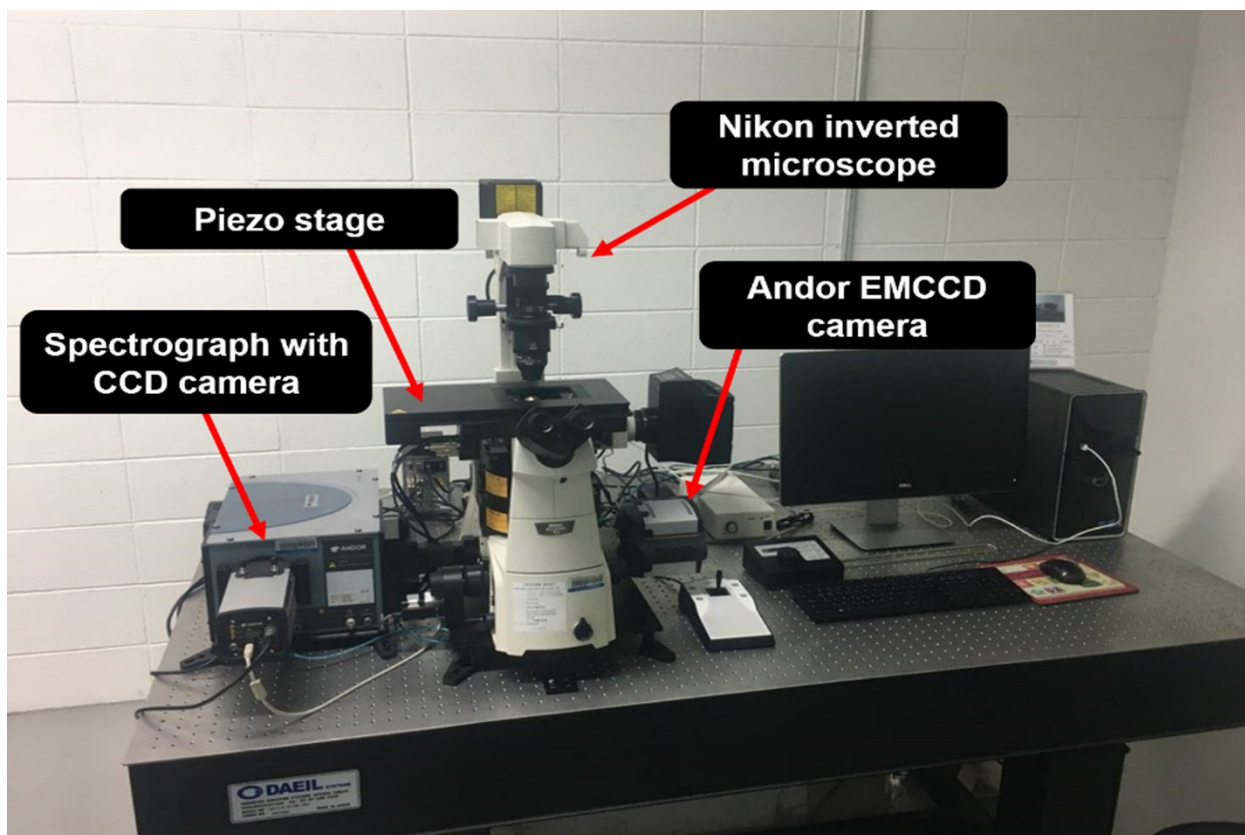

**Fig. S3** A photograph to show the experimental setup for DF microscopy and spectroscopy.

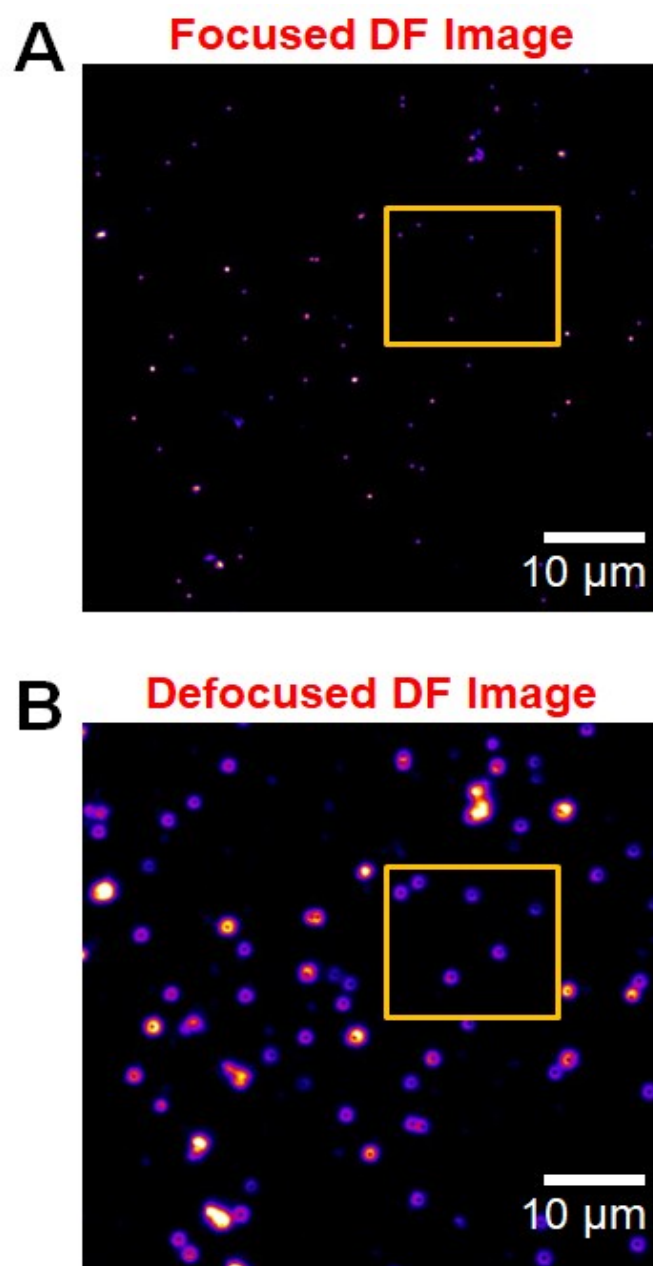

**Fig. S4** (A) Focused DF image of AuNSs. (B) Defocused DF image of the same AuNSs in (A).

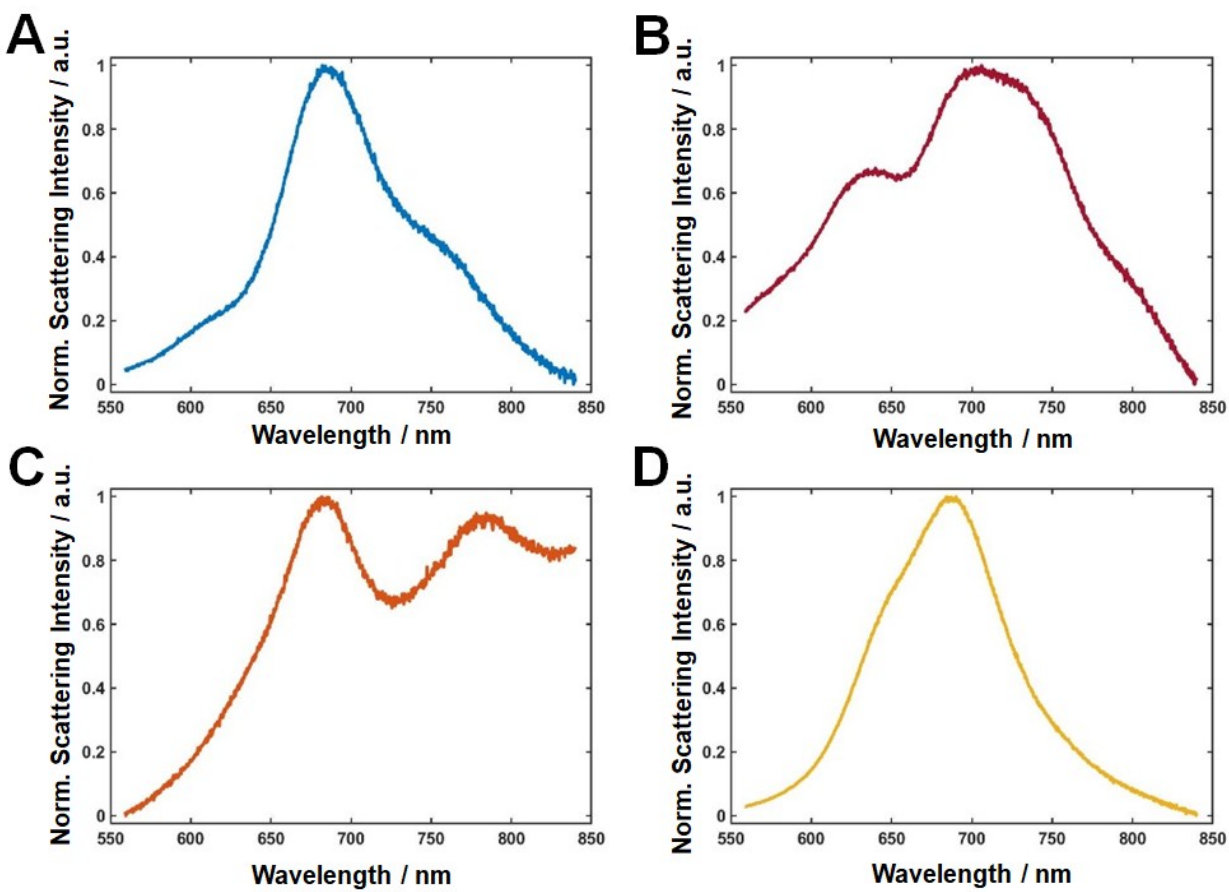

Fig. S5 Normalized scattering spectra of single AuNSs with multiple LSPR peaks.

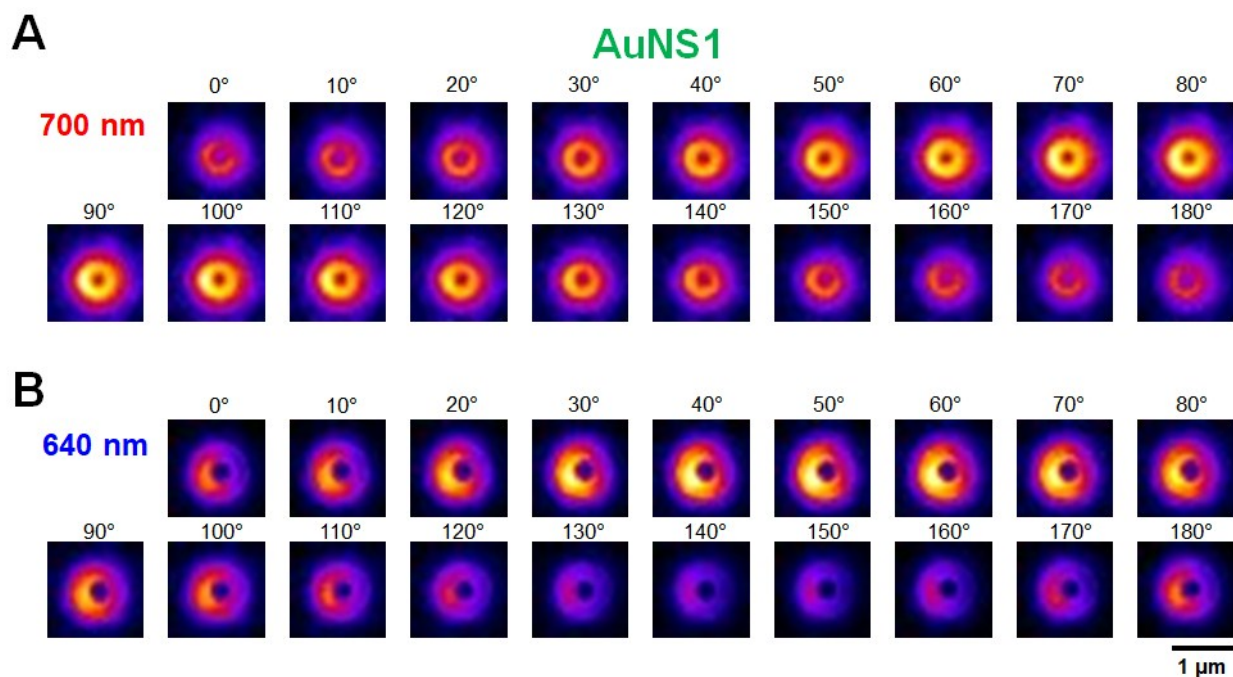

**Fig. S6** (A) Polarization-dependent defocused DF scattering image patterns of AuNS1 from  $0^\circ$  to  $180^\circ$  at  $10^\circ$  increment at 700 nm. (B) Polarization-dependent defocused DF scattering image patterns of AuNS1 from  $0^\circ$  to  $180^\circ$  with  $10^\circ$  increments at 640 nm.



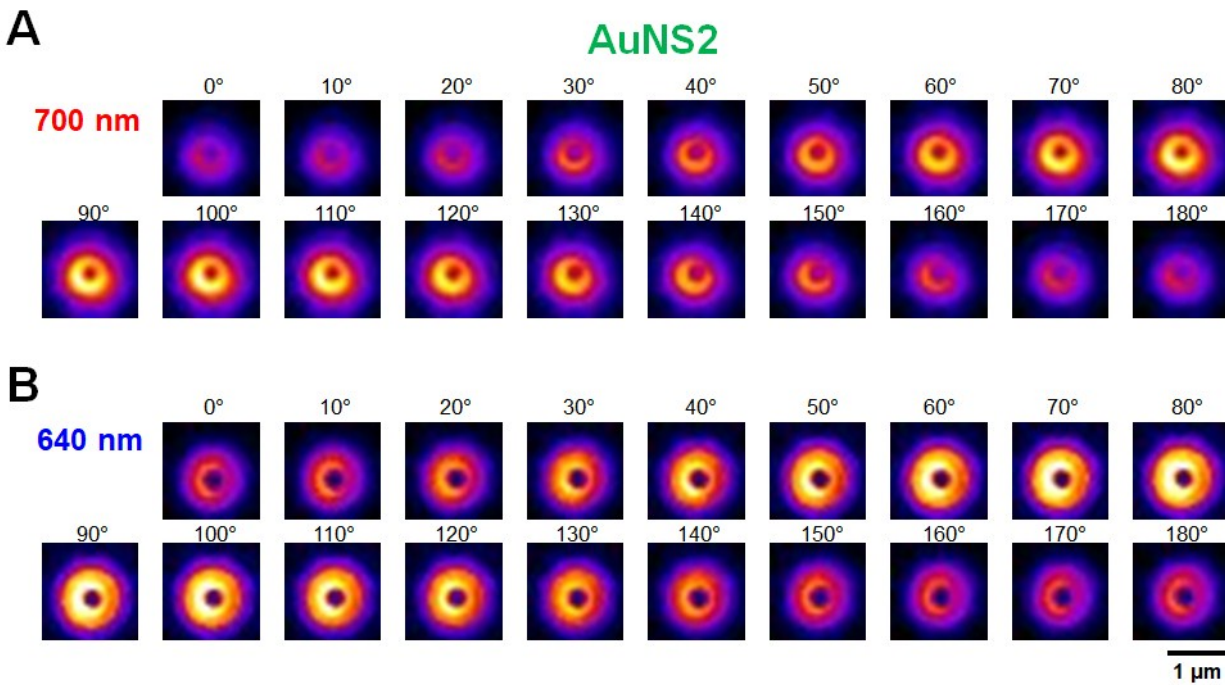

**Fig. S7** (A) Polarization-dependent defocused DF scattering image patterns of AuNS2 from  $0^\circ$  to  $180^\circ$  with  $10^\circ$  increments at 700 nm. (B) Polarization-dependent defocused DF scattering image patterns of AuNS2 from  $0^\circ$  to  $180^\circ$  with  $10^\circ$  increments at 640 nm.

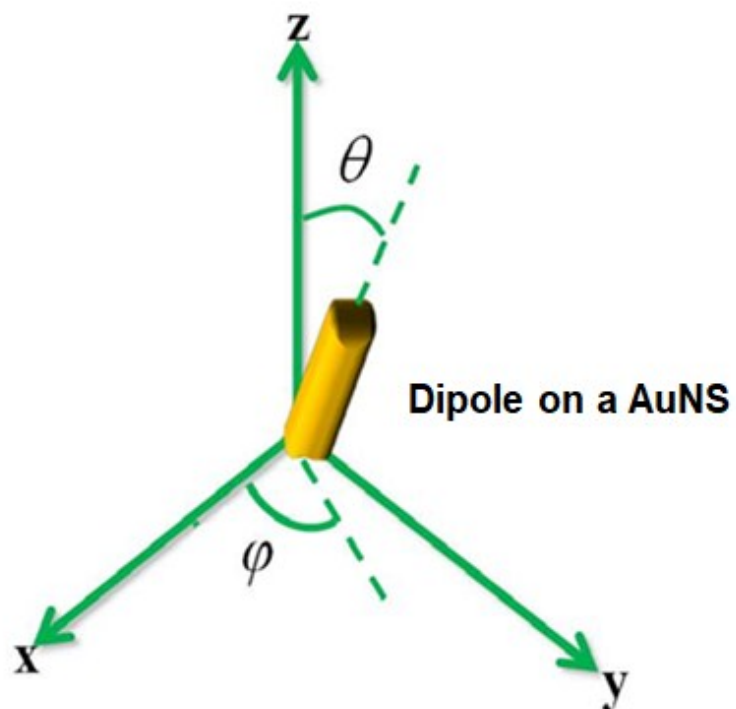

**Fig. S8** Definitions of the polar angle  $\theta$  and the azimuthal angle  $\varphi$  of a dipole on the AuNS in 3D space.

### Defocused DF Images at 700-nm excitation

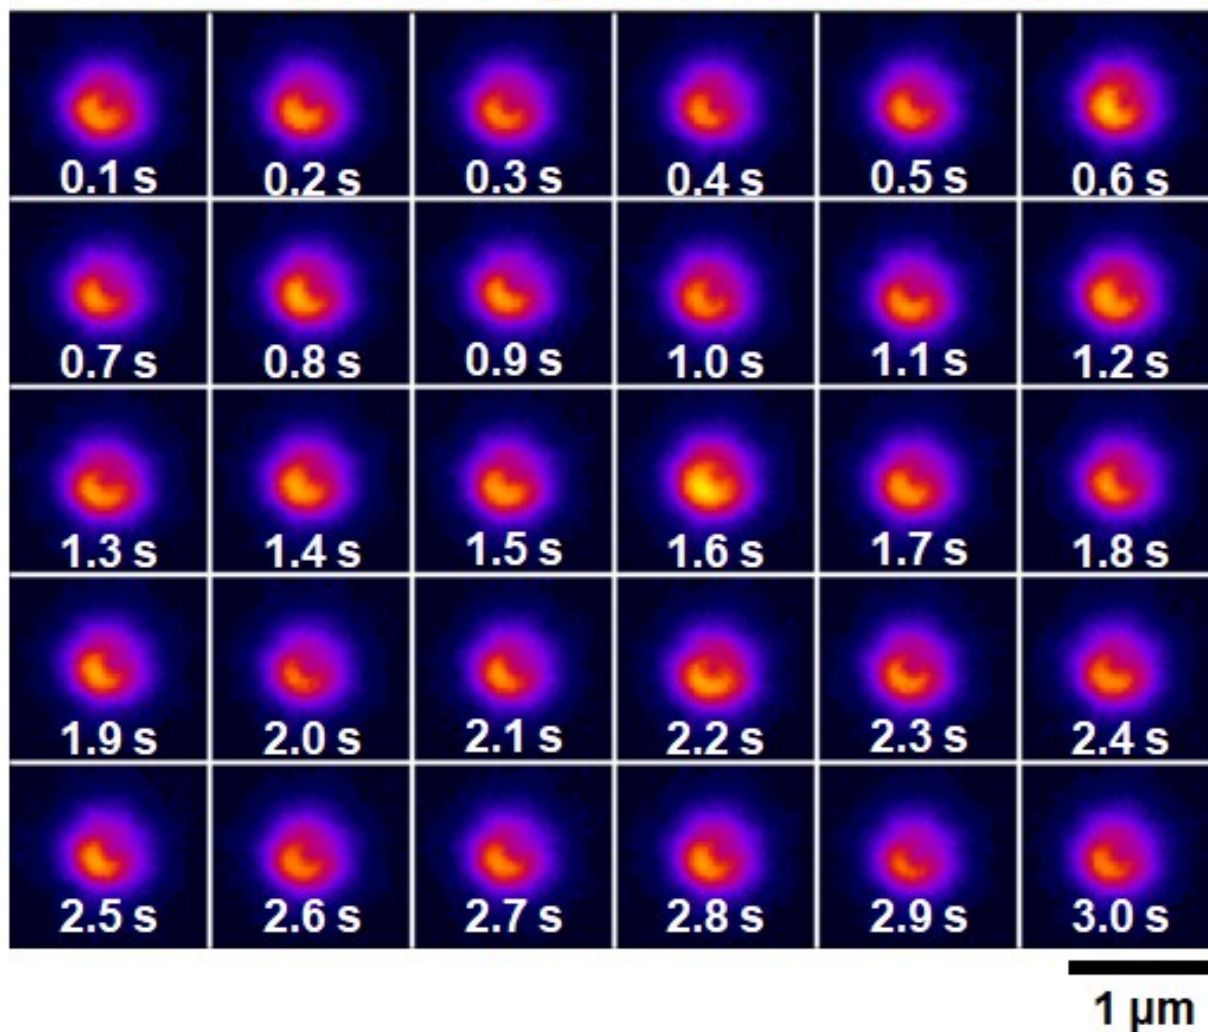

**Fig. S9** 30 consecutive defocused image patterns of single AuNS rotating on a glass slide, detected at 700 nm with a temporal resolution of 100 ms. See Movie S2.
